# Supplementary material for: Efficacy of Wex-cide 128 disinfectant against multiple prion strains
Source: PubMed Central journal article supplement (PMC10449212; doi:10.1371/journal.pone.0290325), 2023-08-24

Efficacy of Wex-cide 128 disinfectant against multiple prion strains

--Manuscript Draft--

|                                                                                                                                                                                                                                                                                                                          |                                                                                                                                                                                                                                                                                                                                                                                                                                                                                                                                                                                                                                                                                                                                                                                                                                                                                                                                                                                                                                                                                                                                                                                                                                                                                                                                                                                                                                                                                                                                                                                                                                                                                                     |
|--------------------------------------------------------------------------------------------------------------------------------------------------------------------------------------------------------------------------------------------------------------------------------------------------------------------------|-----------------------------------------------------------------------------------------------------------------------------------------------------------------------------------------------------------------------------------------------------------------------------------------------------------------------------------------------------------------------------------------------------------------------------------------------------------------------------------------------------------------------------------------------------------------------------------------------------------------------------------------------------------------------------------------------------------------------------------------------------------------------------------------------------------------------------------------------------------------------------------------------------------------------------------------------------------------------------------------------------------------------------------------------------------------------------------------------------------------------------------------------------------------------------------------------------------------------------------------------------------------------------------------------------------------------------------------------------------------------------------------------------------------------------------------------------------------------------------------------------------------------------------------------------------------------------------------------------------------------------------------------------------------------------------------------------|
| <b>Manuscript Number:</b>                                                                                                                                                                                                                                                                                                | PONE-D-23-20329                                                                                                                                                                                                                                                                                                                                                                                                                                                                                                                                                                                                                                                                                                                                                                                                                                                                                                                                                                                                                                                                                                                                                                                                                                                                                                                                                                                                                                                                                                                                                                                                                                                                                     |
| <b>Article Type:</b>                                                                                                                                                                                                                                                                                                     | Research Article                                                                                                                                                                                                                                                                                                                                                                                                                                                                                                                                                                                                                                                                                                                                                                                                                                                                                                                                                                                                                                                                                                                                                                                                                                                                                                                                                                                                                                                                                                                                                                                                                                                                                    |
| <b>Full Title:</b>                                                                                                                                                                                                                                                                                                       | Efficacy of Wex-cide 128 disinfectant against multiple prion strains                                                                                                                                                                                                                                                                                                                                                                                                                                                                                                                                                                                                                                                                                                                                                                                                                                                                                                                                                                                                                                                                                                                                                                                                                                                                                                                                                                                                                                                                                                                                                                                                                                |
| <b>Short Title:</b>                                                                                                                                                                                                                                                                                                      | Wex-cide 128 inactivation of prions                                                                                                                                                                                                                                                                                                                                                                                                                                                                                                                                                                                                                                                                                                                                                                                                                                                                                                                                                                                                                                                                                                                                                                                                                                                                                                                                                                                                                                                                                                                                                                                                                                                                 |
| <b>Corresponding Author:</b>                                                                                                                                                                                                                                                                                             | Brent Race, D.V.M.<br>National Institute of Allergy and Infectious Diseases<br>Hamilton, Montana UNITED STATES                                                                                                                                                                                                                                                                                                                                                                                                                                                                                                                                                                                                                                                                                                                                                                                                                                                                                                                                                                                                                                                                                                                                                                                                                                                                                                                                                                                                                                                                                                                                                                                      |
| <b>Keywords:</b>                                                                                                                                                                                                                                                                                                         |                                                                                                                                                                                                                                                                                                                                                                                                                                                                                                                                                                                                                                                                                                                                                                                                                                                                                                                                                                                                                                                                                                                                                                                                                                                                                                                                                                                                                                                                                                                                                                                                                                                                                                     |
| <b>Abstract:</b>                                                                                                                                                                                                                                                                                                         | <p>Prion diseases are transmissible, fatal neurologic diseases that include Creutzfeldt-Jacob Disease (CJD) in humans, chronic wasting disease (CWD) in cervids, bovine spongiform encephalopathy (BSE) in cattle and scrapie in sheep. Prions are extremely difficult to inactivate and established methods to reduce prion infectivity are often dangerous, caustic, expensive, or impractical. Identifying viable and safe methods for treating prion contaminated materials is important for hospitals, research facilities, biologists, hunters, and meat-processors. For three decades, some prion researchers have used a phenolic product called Environ LpH (eLpH) to inactivate prions. ELpH has been discontinued, but a similar product, Wex-cide 128, containing the similar phenolic chemicals as eLpH is now available. In the current study, we directly compared the anti-prion efficacy of eLpH and Wex-cide 128 against prions from four different species (hamster 263K, cervid CWD, mouse 22L and human CJD). Decontamination was performed on either prion infected brain homogenates or prion contaminated steel wires and mouse bioassay was used to quantify the remaining prion infectivity. Our data show that both eLpH and Wex-cide 128 removed 4.0-5.5 logs of prion infectivity from 22L, CWD and 263K prion homogenates, but only about 1.25-1.50 logs of prion infectivity from human sporadic CJD. Wex-cide 128 is a viable substitute for inactivation of most prions from most species, but the resistance of CJD to phenolic inactivation is a concern and emphasizes the fact that inactivation methods should be confirmed for each target prion strain.</p> |
| <b>Order of Authors:</b>                                                                                                                                                                                                                                                                                                 | <p>Chase Baune</p> <p>Bradley R. Groveman</p> <p>Andrew G. Hughson</p> <p>Tina Thomas</p> <p>Barry Twardoski</p> <p>Suzette Priola</p> <p>Bruce Chesebro</p> <p>Brent Race, D.V.M.</p>                                                                                                                                                                                                                                                                                                                                                                                                                                                                                                                                                                                                                                                                                                                                                                                                                                                                                                                                                                                                                                                                                                                                                                                                                                                                                                                                                                                                                                                                                                              |
| <b>Additional Information:</b>                                                                                                                                                                                                                                                                                           |                                                                                                                                                                                                                                                                                                                                                                                                                                                                                                                                                                                                                                                                                                                                                                                                                                                                                                                                                                                                                                                                                                                                                                                                                                                                                                                                                                                                                                                                                                                                                                                                                                                                                                     |
| <b>Question</b>                                                                                                                                                                                                                                                                                                          | <b>Response</b>                                                                                                                                                                                                                                                                                                                                                                                                                                                                                                                                                                                                                                                                                                                                                                                                                                                                                                                                                                                                                                                                                                                                                                                                                                                                                                                                                                                                                                                                                                                                                                                                                                                                                     |
| <p><b>Financial Disclosure</b></p> <p>Enter a financial disclosure statement that describes the sources of funding for the work included in this submission. Review the <a href="#">submission guidelines</a> for detailed requirements. View published research articles from <a href="#">PLOS ONE</a> for specific</p> | <p>This research was supported by the Intramural Research Program of the NIH, National Institute of Allergy and Infectious Diseases.</p>                                                                                                                                                                                                                                                                                                                                                                                                                                                                                                                                                                                                                                                                                                                                                                                                                                                                                                                                                                                                                                                                                                                                                                                                                                                                                                                                                                                                                                                                                                                                                            |

examples.

This statement is required for submission and **will appear in the published article** if the submission is accepted. Please make sure it is accurate.

**Unfunded studies**

Enter: *The author(s) received no specific funding for this work.*

**Funded studies**

Enter a statement with the following details:

- Initials of the authors who received each award
- Grant numbers awarded to each author
- The full name of each funder
- URL of each funder website
- Did the sponsors or funders play any role in the study design, data collection and analysis, decision to publish, or preparation of the manuscript?
- **NO** - Include this sentence at the end of your statement: *The funders had no role in study design, data collection and analysis, decision to publish, or preparation of the manuscript.*
- **YES** - Specify the role(s) played.

\* typeset

**Competing Interests**

Use the instructions below to enter a competing interest statement for this submission. On behalf of all authors, disclose any [competing interests](#) that could be perceived to bias this work—acknowledging all financial support and any other relevant financial or non-financial competing interests.

This statement is **required** for submission and **will appear in the published article** if the submission is accepted. Please make sure it is accurate and that any funding sources listed in your Funding Information later in the submission form are also declared in your Financial Disclosure statement.

The authors declare that they have no competing interests.

View published research articles from [PLOS ONE](#) for specific examples.

#### NO authors have competing interests

Enter: *The authors have declared that no competing interests exist.*

#### Authors with competing interests

Enter competing interest details beginning with this statement:

*I have read the journal's policy and the authors of this manuscript have the following competing interests: [insert competing interests here]*

\* typeset

#### Ethics Statement

Enter an ethics statement for this submission. This statement is required if the study involved:

- Human participants
- Human specimens or tissue
- Vertebrate animals or cephalopods
- Vertebrate embryos or tissues
- Field research

Write "N/A" if the submission does not require an ethics statement.

General guidance is provided below. Consult the [submission guidelines](#) for detailed instructions. **Make sure that all information entered here is included in the Methods section of the manuscript.**

All mice were housed at the Rocky Mountain Laboratory (RML) in an AAALAC accredited facility in compliance with guidelines provided by the Guide for the Care and Use of Laboratory Animals (Institute for Laboratory Animal Research Council). Experimentation followed RML IACUC approved protocol #2021-003-E. Mice were euthanized by inhalation isoflurane overdose followed by cervical dislocation.

**Format for specific study types**

**Human Subject Research (involving human participants and/or tissue)**

- Give the name of the institutional review board or ethics committee that approved the study
- Include the approval number and/or a statement indicating approval of this research
- Indicate the form of consent obtained (written/oral) or the reason that consent was not obtained (e.g. the data were analyzed anonymously)

**Animal Research (involving vertebrate animals, embryos or tissues)**

- Provide the name of the Institutional Animal Care and Use Committee (IACUC) or other relevant ethics board that reviewed the study protocol, and indicate whether they approved this research or granted a formal waiver of ethical approval
- Include an approval number if one was obtained
- If the study involved *non-human primates*, add *additional details* about animal welfare and steps taken to ameliorate suffering
- If anesthesia, euthanasia, or any kind of animal sacrifice is part of the study, include briefly which substances and/or methods were applied

**Field Research**

Include the following details if this study involves the collection of plant, animal, or other materials from a natural setting:

- Field permit number
- Name of the institution or relevant body that granted permission

**Data Availability**

Authors are required to make all data underlying the findings described fully available, without restriction, and from the time of publication. PLOS allows rare exceptions to address legal and ethical concerns. See the [PLOS Data Policy](#) and [FAQ](#) for detailed information.

Yes - all data are fully available without restriction

A Data Availability Statement describing where the data can be found is required at submission. Your answers to this question constitute the Data Availability Statement and **will be published in the article**, if accepted.

**Important:** Stating 'data available on request from the author' is not sufficient. If your data are only available upon request, select 'No' for the first question and explain your exceptional situation in the text box.

Do the authors confirm that all data underlying the findings described in their manuscript are fully available without restriction?

**Describe where the data may be found in full sentences. If you are copying our sample text, replace any instances of XXX with the appropriate details.**

- If the data are **held or will be held in a public repository**, include URLs, accession numbers or DOIs. If this information will only be available after acceptance, indicate this by ticking the box below. For example: *All XXX files are available from the XXX database (accession number(s) XXX, XXX).*
- If the data are all contained **within the manuscript and/or Supporting Information files**, enter the following:  
*All relevant data are within the manuscript and its Supporting Information files.*
- If neither of these applies but you are able to provide **details of access elsewhere**, with or without limitations, please do so. For example:

*Data cannot be shared publicly because of [XXX]. Data are available from the XXX Institutional Data Access / Ethics Committee (contact via XXX) for researchers who meet the criteria for access to confidential data.*

*The data underlying the results presented in the study are available from (include the name of the third party*

All relevant data are within the manuscript and its Supporting Information files.

*and contact information or URL).*

- This text is appropriate if the data are owned by a third party and authors do not have permission to share the data.

\* typeset

Additional data availability information:

1 Efficacy of Wex-cide 128 disinfectant against multiple prion strains

2 by

3 Chase Baune<sup>1</sup>, Bradley R. Groveman<sup>1</sup>, Andrew G. Hughson<sup>1</sup>, Tina Thomas<sup>2</sup>, Barry Twardoski<sup>3</sup>,  
4 Suzette Priola<sup>1</sup>, Bruce Chesebro<sup>1</sup> and Brent Race<sup>1#</sup>

5  
6 <sup>1</sup>The Laboratory of Neurological Infections and Immunity, Rocky Mountain Laboratories,  
7 National Institute of Allergy and Infectious Diseases, National Institutes of Health, 903 South  
8 Fourth Street, Hamilton, Montana 59840 USA

9 <sup>2</sup>Rocky Mountain Veterinary Branch, Rocky Mountain Laboratories, National Institute of  
10 Allergy and Infectious Diseases, National Institutes of Health, 903 South Fourth Street,  
11 Hamilton, Montana 59840 USA

12 <sup>3</sup>Office of Operations Management, Rocky Mountain Laboratories, National Institute of Allergy  
13 and Infectious Diseases, National Institutes of Health, 903 South Fourth Street, Hamilton,  
14 Montana 59840 USA

15 # Corresponding author: Brent Race, D.V.M., telephone: 1-406-363-9360 (office), FAX 1-406-  
16 363-9286

17 Abstract word count: 237

18 Keywords: prion, scrapie, CJD, CWD, inactivation, decontamination, phenol, Wex-cide 128,  
19 human

20 Running title: Wex-cide 128 inactivation of prions

21 **Abstract**

22 Prion diseases are transmissible, fatal neurologic diseases that include Creutzfeldt-Jacob Disease  
23 (CJD) in humans, chronic wasting disease (CWD) in cervids, bovine spongiform encephalopathy  
24 (BSE) in cattle and scrapie in sheep. Prions are extremely difficult to inactivate and established  
25 methods to reduce prion infectivity are often dangerous, caustic, expensive, or impractical.  
26 Identifying viable and safe methods for treating prion contaminated materials is important for  
27 hospitals, research facilities, biologists, hunters, and meat-processors. For three decades, some  
28 prion researchers have used a phenolic product called Environ LpH (eLpH) to inactivate prions.  
29 ELpH has been discontinued, but a similar product, Wex-cide 128, containing the similar  
30 phenolic chemicals as eLpH is now available. In the current study, we directly compared the  
31 anti-prion efficacy of eLpH and Wex-cide 128 against prions from four different species  
32 (hamster 263K, cervid CWD, mouse 22L and human CJD). Decontamination was performed on  
33 either prion infected brain homogenates or prion contaminated steel wires and mouse bioassay  
34 was used to quantify the remaining prion infectivity. Our data show that both eLpH and Wex-  
35 cide 128 removed 4.0-5.5 logs of prion infectivity from 22L, CWD and 263K prion  
36 homogenates, but only about 1.25-1.50 logs of prion infectivity from human sporadic CJD.  
37 Wex-cide 128 is a viable substitute for inactivation of most prions from most species, but the  
38 resistance of CJD to phenolic inactivation is a concern and emphasizes the fact that inactivation  
39 methods should be confirmed for each target prion strain.

40

41

42



43 **Introduction**

44 Prion diseases, also known as transmissible spongiform encephalopathies (TSE), are  
45 unique infectious diseases that occur following the repeated conversion of normal host derived  
46 cellular prion protein (PrPC) into a mis-folded, protease-resistant, infectious, disease associated  
47 conformation (PrPSc) [1]. Unfortunately, infectious prions are inherently difficult to inactivate  
48 and have posed a biosafety challenge for research laboratories, medical facilities, and meat  
49 processing plants for many years. Common physical and chemical methods for destruction of  
50 bacterial and viral pathogens are not effective in eliminating prion infectivity. However, several  
51 chemical disinfectants, including concentrated sodium hypochlorite (bleach) sodium hydroxide  
52 (NaOH), and Environ LpH (eLpH) have been identified that do inactivate prions [2-4]. Only  
53 eLpH, bleach and NaOH are included as “Prion Inactivation Methods for Reusable Instruments  
54 and Surfaces” in the 5<sup>th</sup> and 6<sup>th</sup> editions of the Biosafety in Microbiological and Biomedical  
55 Laboratories published by the CDC and NIH. Of the three chemical inactivation options, each  
56 has its pros and cons.

57 Environ LpH is much less caustic to equipment and not as toxic or cumbersome to handle  
58 and discard appropriately. Importantly, eLpH has the ability to remove greater than  $10^7$  LD<sub>50s</sub> of  
59 prion infectivity from 263K scrapie infected hamster brain homogenate [2]. The mode of action  
60 for eLpH against prion inactivation was never identified, but research on several other phenolic  
61 products in the LpH series showed poor anti-prion activity [4]. Unfortunately, production of  
62 eLpH has been discontinued. However, a similar phenolic product, which includes two of the  
63 same phenols (Ortho-benzyl-para-chlorophenol (BP) and O-phenylphenol (OPP)) present in  
64 eLpH is now available from Wexford Labs marketed as Wex-cide 128. Wex-cide 128 is an EPA

65 registered pesticide marketed as a disinfectant, deodorizer and cleaner for healthcare, schools,  
66 and industry. We were interested in the potential of Wex-cide 128 as a prion disinfectant.

67 In the current study, we compared the efficacy of Wex-cide 128 to eLpH against  
68 infectious prions derived from four different species: hamster adapted 263K scrapie, white-tailed  
69 deer Chronic Wasting Disease (CWD), mouse-adapted scrapie strain 22L, and one human prion  
70 strain, MM1 sporadic Creutzfeldt-Jacob Disease (sCJD). We tested all four prion strains by  
71 decontaminating prion infected brain homogenates followed by animal bioassay to measure  
72 remaining prion infectivity. For two of the strains, 263K and sCJD, we also tested inactivation  
73 of prions bound to steel wires. Steel wires act as a surrogate for surgical instruments and have a  
74 non-porous surface similar to many coatings present in laboratories and hospitals. Our results  
75 using mouse bioassays showed that both eLpH and Wex-cide 128 were highly efficacious and  
76 suitable for inactivation of CWD, 22L and 263K prions, but much less effective against human  
77 sCJD. The discovery that sCJD was more resistant to inactivation by phenolic disinfectants is a  
78 concern and reaffirms that prion disinfectant efficacy must be verified for each target prion  
79 strain/species, as not all infectious prions are inactivated equally [5-10].

80

## 81 **Results**

### 82 **Efficacy and shelf life of Wex-cide 128 against 263K hamster prions**

83 Wex-cide 128 is typically used at a 1:128 dilution (~0.8%) for general disinfectant  
84 applications. However, in our studies we tested a 4% dilution of Wex-cide 128 in order to  
85 normalize the BP concentration to what is present in 2% eLpH (Table 1). Environ LpH has  
86 previously established efficacy against 263K hamster prions and is routinely used in our

87 laboratory as a 2% solution to inactivate prions. We have included 2% eLpH in the current study  
88 as a prion inactivation control and experimental group for historical/experimental comparison.  
89 We also tested Wex-cide 128 at a ten-fold higher concentration (40%) to better understand the  
90 level of phenols necessary for anti-prion activity. Ten percent 263K-infected brain homogenates  
91 were mixed at a 1:9 ratio of brain homogenate to disinfectant for 30 minutes. After this  
92 decontamination step, the brain homogenate/disinfectant mixture was further diluted and  
93 immediately inoculated intracerebrally into tg7 mice. Additional dilution was necessary to  
94 prevent acute toxicity in recipient bioassay mice due to the residual disinfectant. As a no  
95 treatment control, 263K brain homogenate was treated with saline for 30 minutes prior to  
96 dilution and inoculation.

97 **Table 1.** Chemical composition of undiluted, stock phenolic disinfectants

| <b><u>Ingredient</u></b>       | <b><u>Environ-LpH<br/>(% by weight)</u></b> | <b><u>Wex-Cide 128<br/>(% by weight)</u></b> |     |
|--------------------------------|---------------------------------------------|----------------------------------------------|-----|
| Ortho-benzyl-para-chlorophenol | 6.4                                         | 3.03                                         | 99  |
| o-Phenylphenol                 | 0.5                                         | 3.4                                          |     |
| Hexylene glycol                | 4                                           | 10-30                                        | 100 |
| Isopropanol                    | 8                                           | 1-5                                          |     |
| Glycolic Acid                  | 12.6                                        | 0                                            |     |
| P-tertiary-amylphenol          | 3                                           | 0                                            | 101 |

102

103

104

105           Our data showed 4% Wex-cide 128 and 2% eLpH both reduced 263K infectivity by over  
 106 5 logs compared to saline treatment alone (Table 2.). Importantly, our data also showed no  
 107 added benefit to using 40% Wex-cide over 4% against 263K prions. Interestingly, one mouse  
 108 inoculated with a 10<sup>-3</sup> dilution of eLpH treated 263K did develop prion disease at a late time  
 109 (Table 2). To our knowledge, this is the first time eLpH failed to inactivate prions in brain  
 110 homogenate to below detectable limits, [2, 4, 11] but the stock eLpH used for these studies was  
 111 at least a decade post-manufacture and may have lost full efficacy.

112

113

114

115

116

117

118

119 **Table 2.** Bioassay of disinfected 263K brain homogenate in tg7 mice

| Disinfectant (fresh) | Dilution of 263K scrapie brain homogenate inoculated after treatment <sup>a</sup> |                  |                  |                  |                  |                  |                  | Titer <sup>b</sup> | Log <sub>10</sub> Reduction in titer |
|----------------------|-----------------------------------------------------------------------------------|------------------|------------------|------------------|------------------|------------------|------------------|--------------------|--------------------------------------|
|                      | 10 <sup>-3</sup>                                                                  | 10 <sup>-4</sup> | 10 <sup>-5</sup> | 10 <sup>-6</sup> | 10 <sup>-7</sup> | 10 <sup>-8</sup> | 10 <sup>-9</sup> |                    |                                      |
| Saline               | 4/4 <sup>c</sup> , 55                                                             | 4/4, 62          | 4/4, 66          | 4/4, 71          | 4/4, 81.5        | 1/4, 258         | 1/4, 146         | 9.5                | NA                                   |
| 40% Wex-cide         | nt                                                                                | 0/5              | 0/4              | 0/4              | nt               | nt               | nt               | ≤ 5.0              | ≥4.5                                 |
| 4% Wex-cide          | 0/6                                                                               | 0/3              | 0/4              | 0/3              | nt               | nt               | nt               | ≤ 4.0              | ≥5.5                                 |
| 2% LPH               | 1/4, 197                                                                          | 0/4              | 0/4              | nt               | nt               | nt               | nt               | 4.25               | 5.25                                 |
| Disinfectant (aged)  |                                                                                   |                  |                  |                  |                  |                  |                  |                    |                                      |
| 4% Wex-cide 6 weeks  | 0/8, 288                                                                          | 0/6              | 0/5              | nt               | nt               | nt               | nt               | ≤ 4.0              | ≥5.5                                 |
| 2% LPH 6 weeks       | 0/8, 288                                                                          | 0/7              | 0/6              | nt               | nt               | nt               | nt               | ≤ 4.0              | ≥5.5                                 |
| 4% Wex-cide 8 months | 0/8, 299                                                                          | 0/6              | 0/7              | nt               | nt               | nt               | nt               | ≤ 4.0              | ≥5.5                                 |
| 2% LPH 8 months      | 0/8, 299                                                                          | 0/9              | 0/5              | nt               | nt               | nt               | nt               | ≤ 4.0              | ≥5.5                                 |

120

121 <sup>a</sup>Aliquots of 263K brain homogenates (10%) were exposed to different disinfectants or saline for 30  
 122 minutes at a 1:9 ratio. Solutions were then further diluted for bioassay in mice. Each recipient mouse  
 123 received 30µl of inoculum.

124 <sup>b</sup> The calculated titer reported is the log<sub>10</sub>LD<sub>50</sub> / gram of tissue

125 <sup>c</sup> The numerator is the number of prion-positive mice (see methods), and the denominator is the  
 126 number of mice inoculated. For groups with positive mice the average incubation period in days-post  
 127 inoculation (dpi) is provided. Tg7 mice typically do not develop 263K prion disease after 200 dpi. Mice  
 128 that did not develop clinical signs of prion disease were euthanized at 288-300 dpi.

129 NA: not applicable, nt: not tested

130

131 To test the shelf-life of Wex-cide 128, we performed similar prion inactivation  
132 experiments to those described above using disinfectants that had been diluted and aged. Wex-  
133 cide 128 and eLpH were diluted to 4% and 2% respectively and kept on the laboratory bench for  
134 either 6 weeks or 8 months at room temperature and natural light conditions. After aging, the  
135 diluted disinfectants were used to decontaminate 263K brain homogenates and the treated  
136 homogenates were inoculated into recipient tg7 mice to detect remaining prion infectivity. Mice  
137 in this experiment were observed up to 299 days post-inoculation (dpi). During this observation  
138 time, no mice developed signs of clinical disease. Following euthanasia, brains from three mice  
139 that appeared normal at the termination of the experiment, tested positive by immunoblot. These  
140 subclinical infections occurred in one mouse from each of the  $10^{-3}$  Wex-cide groups and one  
141 mouse from the eLpH that had been aged 6 weeks (Supplementary Table 1). Since these mice  
142 did not meet our full criteria for scoring positive (see methods), they have been excluded from  
143 table 2. Using the aged disinfectants, 263K prion infectivity was again reduced by over 5 logs  
144 by both 4% Wex-cide 128 and 2% eLpH, demonstrating that both phenolic mixtures have  
145 stability to at least 8 months post-dilution (Table 2).

146

#### 147 **Efficacy of Wex-cide 128 against stainless-steel bound 263K hamster prions**

148 We next studied whether Wex-cide 128 could inactivate prions that were bound to steel  
149 surfaces. The ability of a disinfectant to eliminate dried prions from surfaces is an important  
150 consideration for any chemical that may be used as a prion decontaminant. As a surrogate for a  
151 stainless-steel surface, we used 3-4 mm segments of stainless-steel wire suture. Wires coated  
152 with 263K prions (see methods) were immersed in either 4% Wex-cide 128 or 2% eLpH for  
153 either 2 minutes or 30 minutes. Two minutes was tested as a reasonable contact time for a

154 disinfectant applied to a hard surface such a biosafety cabinet or countertop. Thirty minutes  
155 simulated an immersion situation, where instruments or tools could be placed in a container of  
156 disinfectant. Following decontamination wires were rinsed briefly with distilled water and  
157 allowed to air dry. As a positive control, and to provide an estimate of how much prion  
158 infectivity could be maximally bound to the wires, we also immersed groups of wires in serial  
159 ten-fold dilutions of 263K brain homogenate. Positive control (no disinfectant treatment) and  
160 treated wires were implanted into the brains of recipient tg7 mice as a biological indicator of  
161 prion infectivity. None of the mice implanted with Wex-cide or eLpH treated wires developed  
162 prion disease after a 300-day observation period (Table 3). Wires that were exposed to serial  
163 dilutions of 263K prions caused clinical disease in tg7 mice with incubation periods that  
164 correlated closely with the concentration of 263K used to coat the wire (Table 3). If we assume  
165 that the prion infectivity on the wire correlates to the exposure dose, we estimate that over 6 logs  
166 of infectivity was inactivated by the Wex-cide and eLpH treatments, even with as little as a 2-  
167 minute exposure time.

168

169 **Table 3.** Bioassay of disinfected 263K coated wires in tg7 mice

| Disinfectant | Exposure Time (min) | Dilution of 263K brain homogenate used to coat wires, prior to treatment <sup>a</sup> |                  |                  |                  |                  | Titer <sup>b</sup> | Log <sub>10</sub> Reduction in titer |
|--------------|---------------------|---------------------------------------------------------------------------------------|------------------|------------------|------------------|------------------|--------------------|--------------------------------------|
|              |                     | 10 <sup>-1</sup>                                                                      | 10 <sup>-4</sup> | 10 <sup>-5</sup> | 10 <sup>-6</sup> | 10 <sup>-7</sup> |                    |                                      |
| None         | NA                  | 5/5 <sup>c</sup> , 65                                                                 | 4/4, 83          | 4/4, 95.5        | 5/5, 142         | 1/8, 125         | 6.6                | NA                                   |
| 4% Wex-cide  | 2                   | 0/4                                                                                   | nt               | nt               | nt               | nt               | < 0.5              | ≥6.1                                 |
| 4% Wex-cide  | 30                  | 0/4                                                                                   | nt               | nt               | nt               | nt               | < 0.5              | ≥6.1                                 |
| 2% LPH       | 2                   | 0/7                                                                                   | nt               | nt               | nt               | nt               | < 0.5              | ≥6.1                                 |
| 2% LPH       | 30                  | 0/6                                                                                   | nt               | nt               | nt               | nt               | < 0.5              | ≥6.1                                 |

170

171 <sup>a</sup> Steel wires were exposed to 263K prion infected brain homogenates, then washed, dried, and  
 172 immersed in different disinfectants for either 2 or 30 minutes. Following treatment wires were removed  
 173 and allowed to dry. Each mouse was implanted intracerebrally with a single 3-4 mm wire.

174 <sup>b</sup> The calculated titer reported is the log<sub>10</sub>LD<sub>50</sub> / wire

175 <sup>c</sup> The numerator is the number of prion-positive mice (see methods), and the denominator is the  
 176 number of mice implanted. For groups with positive mice the average incubation period in days-post  
 177 inoculation (dpi) is provided. Tg7 mice typically do not develop 263K prion disease after 200 dpi. Mice  
 178 in this experiment that did not develop clinical signs of prion disease were euthanized at 315 dpi.

179 NA: not applicable, nt: not tested

180

181



182 **Efficacy of Wex-cide 128 against cervid-derived CWD prions and 22L rodent-adapted**  
183 **mouse scrapie prions**

184 Having demonstrated efficacy against hamster 263K prions, we then tested the ability of  
185 4% Wex-cide 128 to remove prion infectivity from both cervid-derived CWD and rodent-  
186 adapted scrapie (strain 22L) prion infected brain homogenates. None of the mice inoculated with  
187 CWD infected brain homogenates treated with 4% Wex-cide 128 or 2% eLpH for 30 minutes  
188 developed prion disease. This indicates that at least 4.77 logs of CWD prion infectivity (Table  
189 4) were removed with Wex-cide treatment. Decontamination of 22L-infected mouse brain  
190 homogenates did not eliminate all the prion infectivity from the brain homogenates. In mice  
191 inoculated with treated  $10^{-3}$  22L-infected mouse brain homogenates, 1/8 mice in the Wex-cide  
192 group and 8/8 mice in the eLpH group developed clinical signs of prion disease. Additionally,  
193 2/7 mice inoculated with  $10^{-4}$  eLpH treated brain homogenate also became clinical. Even with  
194 this evidence of residual prion infectivity, both treatments demonstrated efficacy with 4% Wex-  
195 cide removing over 5 logs of 22L prion infectivity and 2% eLpH removing 4 logs (Table 5).

196

197 **Table 4.** Bioassay of disinfected CWD brain homogenate in tg33 mice

| Disinfectant | Dilution of CWD brain homogenate inoculated after treatment <sup>a</sup> |                  |                  |                  |                  | Titer <sup>b</sup> | Log <sub>10</sub> Reduction in titer <sup>c</sup> |
|--------------|--------------------------------------------------------------------------|------------------|------------------|------------------|------------------|--------------------|---------------------------------------------------|
|              | 10 <sup>-3</sup>                                                         | 10 <sup>-4</sup> | 10 <sup>-5</sup> | 10 <sup>-6</sup> | 10 <sup>-7</sup> |                    |                                                   |
| Saline       | 3/3 <sup>c</sup> , 297                                                   | nt               | 4/4, 440         | 4/4, 379         | 3/4, 533         | 8.77               | NA                                                |
| 4% Wex-cide  | 0/5                                                                      | 0/4              | 0/4              | nt               | nt               | ≤ 4.0              | ≥ 4.77                                            |
| 2% eLpH      | 0/5                                                                      | 0/4              | 0/4              | nt               | nt               | ≤ 4.0              | ≥ 4.77                                            |

203 <sup>a</sup>Aliquots of CWD brain homogenates (10%) were exposed to different disinfectants or saline for 30  
 204 minutes at a 1:9 ratio. Solutions were then further diluted for bioassay in mice. Each recipient mouse  
 205 received 30µl of inoculum.

206 <sup>b</sup> The calculated titer reported is the log<sub>10</sub>LD<sub>50</sub> / gram of tissue

207 <sup>c</sup> The numerator is the number of prion-positive mice (see methods), and the denominator is the  
 208 number of mice inoculated. For groups with positive mice the average incubation period in days-post  
 209 inoculation (dpi) is provided. Tg33 mice typically do not develop CWD prion disease after 600 dpi. Mice  
 210 that did not develop clinical signs of prion disease were euthanized at 650 dpi.

211 NA: not applicable, nt: not tested

212

213 **Table 5.** Bioassay of disinfected 22L brain homogenate in tga20 mice

| Disinfectant | Dilution of 22L brain homogenate inoculated after treatment <sup>a</sup> |                  |                  |                  |                  |                  |                  | Titer <sup>b</sup> | Log <sub>10</sub> Reduction in titer |
|--------------|--------------------------------------------------------------------------|------------------|------------------|------------------|------------------|------------------|------------------|--------------------|--------------------------------------|
|              | 10 <sup>-3</sup>                                                         | 10 <sup>-4</sup> | 10 <sup>-5</sup> | 10 <sup>-6</sup> | 10 <sup>-7</sup> | 10 <sup>-8</sup> | 10 <sup>-9</sup> |                    |                                      |
| Saline       | 4/4 <sup>c</sup> , 94                                                    | 4/4, 104         | 4/4, 112         | 4/4, 126         | 4/4, 156         | 1/4, 149         | 0/4              | 9.25               | NA                                   |
| 4% Wex-cide  | 1/8, 228                                                                 | 0/8              | nt               | nt               | nt               | nt               | nt               | 4.15               | <b>5.1</b>                           |
| 2% eLpH      | 8/8, 158                                                                 | 2/7, 174         | nt               | nt               | nt               | nt               | nt               | 5.3                | <b>4.0</b>                           |

214

215 <sup>a</sup>Aliquots of 22L-infected brain homogenates (10%) were exposed to different disinfectants or saline for  
 216 30 minutes at a 1:9 ratio. Solutions were then further diluted for bioassay in mice. Each recipient  
 217 mouse received 30µl of inoculum.

218 <sup>b</sup> The calculated titer reported is the log<sub>10</sub>LD<sub>50</sub> / gram of tissue

219 <sup>c</sup> The numerator is the number of prion-positive mice (see methods), and the denominator is the  
 220 number of mice inoculated. For groups with positive mice the average incubation period in days-post  
 221 inoculation (dpi) is provided. Tga20 mice typically do not develop 22L prion disease after 200 dpi. Mice  
 222 that did not develop clinical signs of prion disease were euthanized at 289 dpi.

223 NA = not applicable, nt = not tested

224

225 **Efficacy of Wex-cide 128 against sCJD brain homogenates and prion coated steel wires**

226 Decontamination of human tropic prions is an important biomedical and research  
227 biosafety concern. We therefore tested the ability of Wex-cide 128 and eLpH to inactivate sCJD  
228 prions derived from transgenic mice that expressed human prion protein with methionine at  
229 codon 129. We tested inactivation of sCJD in brain homogenates and also bound to stainless  
230 steel wires. We found that sCJD brain homogenates treated for 30 minutes with 2% eLpH or 4%  
231 Wex-cide 128 showed only a slight reduction in prion infectivity of 1.25 logs (Table 6). Using a  
232 ten-fold higher concentration of Wex-cide 128 only improved the reduction in sCJD prion  
233 infectivity by an additional 0.25 logs. Inactivation of steel wire bound sCJD prions was more  
234 effective. We achieved complete removal of prion infectivity when the sCJD coated wires were  
235 immersed for 30 minutes in either eLpH or Wex-cide 128 (Table 7). Two minutes in these same  
236 disinfectants was not as effective, as several mice with treated, implanted wires developed sCJD  
237 (Table 7). In contrast to the 263K coated wires shown in table 3, wires coated with 10-fold serial  
238 dilutions of sCJD did not correlate with increasing incubation periods as the wires were exposed  
239 to less sCJD (Table 7). Because of this non-linear response, and failure to reach an end-point in  
240 our no treatment control we did not attempt to extrapolate a decrease in titer for this experiment.

241

242 **Table 6.** Bioassay of disinfected sCJD brain homogenate in tg66 mice

| Disinfectant | Dilution of sCJD brain homogenate inoculated after treatment <sup>a</sup> |                  |                  |                  |                  | Titer <sup>b</sup> | Log <sub>10</sub> Reduction in titer <sup>c</sup> |
|--------------|---------------------------------------------------------------------------|------------------|------------------|------------------|------------------|--------------------|---------------------------------------------------|
|              | 10 <sup>-3</sup>                                                          | 10 <sup>-4</sup> | 10 <sup>-5</sup> | 10 <sup>-6</sup> | 10 <sup>-7</sup> |                    |                                                   |
| Saline       | 4/4 <sup>c</sup> , 204                                                    | 4/4, 296         | 3/4, 416         | 0/4              | 0/4              | 6.77               | NA                                                |
| 40% Wex-cide | nt                                                                        | 1/5, 434         | 0/4              | 0/4              | nt               | 5.22               | 1.247                                             |
| 4% Wex-cide  | 4/4, 309                                                                  | 2/4, 372         | 0/4              | 0/5              | nt               | 5.52               | 1.248                                             |
| 2% eLpH      | 3/4, 453                                                                  | 3/4, 481         | 0/4              | nt               | nt               | 5.52               | 1.249                                             |

243

244

245

246

247

248

249

250

251 <sup>a</sup>Aliquots of sCJD prion infected brain homogenates (10%) were exposed to different disinfectants or  
 252 saline for 30 minutes at a 1:9 ratio. Solutions were then further diluted for bioassay in mice. Each  
 253 recipient mouse received 30µl of inoculum.

254 <sup>b</sup> The calculated titer reported is the log<sub>10</sub>LD<sub>50</sub> / gram of tissue

255 <sup>c</sup> The numerator is the number of prion-positive mice (see methods), and the denominator is the  
 256 number of mice inoculated. For groups with positive mice the average incubation period in days-post  
 257 inoculation (dpi) is provided. Tg66 mice typically do not develop sCJD after 550 dpi. Mice that did not  
 258 develop clinical signs of prion disease were euthanized at 650 dpi.

259 NA = not applicable, nt = not tested

260

261 **Table 7.** Bioassay of disinfected sCJD coated wires in tg66 mice

262

| Disinfectant                                                                           | Exposure Time (min) | Dilution of sCJD brain homogenate used to coat wires, prior to treatment <sup>a</sup> |                  |                  |                   |
|----------------------------------------------------------------------------------------|---------------------|---------------------------------------------------------------------------------------|------------------|------------------|-------------------|
|                                                                                        |                     | 10 <sup>-1</sup>                                                                      | 10 <sup>-3</sup> | 10 <sup>-4</sup> | 10 <sup>-5</sup>  |
| None                                                                                   | NA                  | 4/4 <sup>c</sup> , 319                                                                | 2/3, 311         | 4/4, 348         | 4/4, 360          |
| 4% Wex-cide                                                                            | 2                   | 1/6, 496                                                                              | nt               | nt               | nt <sup>265</sup> |
| 4% Wex-cide                                                                            | 30                  | 0/6                                                                                   | nt               | nt               | nt <sup>266</sup> |
| 2%  H | 2                   | 5/6, 391                                                                              | nt               | nt               | nt <sup>267</sup> |
| 2%  H | 30                  | 0/6                                                                                   | nt               | nt               | nt <sup>268</sup> |
| Water                                                                                  | 30                  | 6/6, 303                                                                              | nt               | nt               | nt <sup>269</sup> |

271

272 <sup>a</sup> Steel wires were exposed to sCJD prion infected brain homogenates, then washed, dried, and  
 273 immersed in different disinfectants for either 2 or 30 minutes. Following treatment wires were removed  
 274 and allowed to dry. Each mouse was implanted intracerebrally with a single 3-4 mm wire.

275 <sup>b</sup> The calculated titer reported is the log<sub>10</sub>LD<sub>50</sub> / wire

276 <sup>c</sup> The numerator is the number of prion-positive mice (see methods), and the denominator is the  
 277 number of mice inoculated. For groups with positive mice the average incubation period in days-post  
 278 inoculation (dpi) is provided. Tg66 mice typically do not develop sCJD after 550 dpi. Mice that did not  
 279 develop clinical signs of prion disease were euthanized at 650 dpi.

280 NA = not applicable, nt =  tested

281

282

283 **Discussion**

284 For decades prion researchers have used eLpH as an effective alternative to bleach or  
285 NaOH to chemically inactivate prions. After eLpH became unavailable we sought to find a  
286 suitable acidic phenol that had comparable or increased prion inactivation ability. Wex-cide 128  
287 was a clear candidate to screen as it contained the same two phenols that are the main  
288 components in eLpH (Table 1).

289 In our experiments, a 30-minute treatment using 4% Wex-cide 128 reduced prion  
290 infectivity from brain homogenates by at least  $10^4$  infectious units for 263K, 22L and CWD  
291 (Table 8). Many of these reductions are likely to be underestimations as our lower limit of  
292 detection in the assay is dictated by acute toxicity from the disinfectant and prevents us from  
293 testing more concentrated samples. Wex-cide 128 treatment also removed at least  $10^6$  infectious  
294 units from 263K coated steel wires (Table 3). Compared to eLpH, Wex-cide 128 was equal to or  
295 superior to eLpH in reduction of infectious prions derived from four different species (Table 8).  
296 Wex-cide 128 also demonstrated stable shelf life of at least 8 months following dilution to a 4%  
297 working concentration (Table 2). Collectively, we believe our data show that 4% Wex-cide 128  
298 is a valid replacement for 2% eLpH for use against 263K, 22L and CWD prions. Beyond the  
299 research laboratory, Wex-cide 128 provides a less dangerous and less corrosive option compared  
300 to concentrated bleach, and may be useful for wildlife biologists, meat processors, and hunters  
301 handling CWD [12].

302

303 **Table 8.** Summary of 4% Wex-cide 128 and 2% eLpH inactivation of prions in brain homogenates

|              | 304<br>Reduction in prion titer ( $\log_{10}$ ) for each strain of prion |                         |                         |                                 |
|--------------|--------------------------------------------------------------------------|-------------------------|-------------------------|---------------------------------|
| Disinfectant | 263K (9.5) <sup>1</sup>                                                  | CWD (8.77) <sup>1</sup> | 22L (9.25) <sup>1</sup> | sCJD (6.77) <sup>1</sup><br>305 |
| 4% Wex-cide  | ≥ 5.5                                                                    | ≥ 4.77                  | 5.1                     | 1.5                             |
| 2% eLpH      | 5.25                                                                     | ≥ 4.77                  | 4.0                     | 1.25<br>306                     |

307

308 <sup>1</sup>The beginning prion titer ( $\log_{10}$ ) per gram of 100% prion infected brain determined

309 by mouse bioassay for each prion strain.

310



311 The utility of wires as a surrogate for surfaces and instruments have been used with  
312 success by several other groups testing prion inactivation [5, 8, 13-17]. Our studies using 263K  
313 coated steel wires had a clear advantage in sensitivity over the homogenate bioassays (Tables  
314 2&3). Following prion coating and subsequent decontamination, the steel wires can be dried,  
315 effectively eliminating residual decontaminate solution. This feature allows higher sensitivity, as  
316 decontaminated brain homogenates must be diluted prior to inoculation in mice to avoid acute  
317 toxicity. In the current study we found that 263K prions and sCJD prions appear to have  
318 differing affinities for binding steel. Bioassay data from implanted wires coated with 10-fold  
319 decreasing concentrations of 263K dilutions showed that wires exposed to fewer 263K prions  
320 bound less infectious 263K prions based on incubation periods in mice (Table 3). This data was  
321 also similar to previous studies using 263K or vCJD coated wires [9, 11]. The same trend was  
322 not observed in our wire experiments with sCJD, where decreasing concentrations of sCJD did  
323 not correspond to less sCJD infectivity on the wire. We are not certain why this is, but postulate  
324 that sCJD prions bind the wire with higher affinity, as different prion strains have been  
325 documented to bind metals differentially [18]. Unfortunately, we did not reach an endpoint in  
326 our control wire bioassay (Table 7). But even if an endpoint had been reached, the non-linear  
327 survival times with the sCJD control wires made estimation of reductions in titers unreliable for  
328 this experiment.

329 While identification of the key chemical responsible for inactivation of prions was not a  
330 primary goal of our project, we believe that data from our current study combined with previous  
331 work identifies the likely anti-prion phenol. Only two phenol derivatives are present in Wexcide  
332 128, BP at 3.03% and OPP at 3.4%. Previous work showed that a phenolic mixture that  
333 contained OPP at 7.7%, but no BP, had no reduction in prion infectivity [4]. By deduction, the

334 phenolic component of Wex-cide 128 that provides the most anti-prion properties is likely BP.  
335 The third phenolic derivative in eLpH was para-tertiary amyphenol (PTAP). In 2020 the U.S.  
336 Environmental Protection Agency (EPA) mandated a full phase-out of PTAP in EPA registered  
337 pesticides.

338         The discovery that neither eLpH or Wex-cide 128 were very effective against sCJD brain  
339 homogenates was a concern, but not entirely surprising. Previous studies have shown that  
340 different prion strains can differ in resistance to inactivation [5-10, 19]. Of particular interest  
341 were the data showing that sCJD was 10,000-100,000 times more resistant to acidic SDS  
342 inactivation compared to hamster scrapie [5, 8]. The ability of sCJD to resist acidic SDS  
343 treatment and phenolic chemicals demonstrated that sCJD may also be more difficult to  
344 inactivate using other currently approved methods.

345         As a biosafety precaution we reviewed the literature specific to chemical inactivation of  
346 sCJD. Several manuscripts from years ago reported concentrated bleach decreased CJD prion  
347 infectivity by 3-4 logs [20-22]. Unfortunately, the CJD tested in these studies was not directly  
348 derived from human brain, but was instead obtained from CJD that had been adapted to either  
349 guinea pigs [20, 21] or mice [20, 22]. Guinea pigs and mice both have very different PrPC  
350 amino acid sequences compared to humans. This was of great concern as we now understand  
351 that passaging a prion strain into a novel host does not guarantee the prion strain, protein folding,  
352 or susceptibility to inactivation will remain consistent with the original strain. This has been  
353 clearly demonstrated with BSE prions, where bovine BSE was shown to be 1,000 times more  
354 resistant to SDS inactivation than BSE adapted to B6 mice [5]. Unfortunately, it appears that  
355 many of the existing recommendations for inactivation of human prions were based on human  
356 prions passed through rodent models and those models may not be an accurate prediction for

357 human prion strains [10]. Fortunately, Belondrade et. al has recently tested many chemicals  
358 against variant CJD [9, 19] and Mori et. al has shown good inactivation of sCJD prion seeding  
359 activity from steel wires using 1 M NaOH [17]. Additional studies should be performed with  
360 other prion strains to confirm that proposed or recommended decontamination methods are  
361 adequate for the targeted strain.

362

## 363 **Materials and Methods**

### 364 **Experimental mice**

365 All mice were housed at the Rocky Mountain Laboratory (RML) in an AAALAC  
366 accredited facility in compliance with guidelines provided by the Guide for the Care and Use of  
367 Laboratory Animals (Institute for Laboratory Animal Research Council). Experimentation  
368 followed RML Animal Care and Use Committee approved protocol #2021–003-E.

369 Generation of tg66 transgenic mice expressing human PrP were described previously  
370 [23]. Tg66 mice were originally made by Richard Rubenstein and provided to RML by Robert  
371 Rohwer. Tg66 mice are on an FVB/N genetic background and are homozygous for a transgene  
372 that encodes human prion protein M129. Tg66 mice overexpress human PrP at 8–16-fold levels  
373 higher than normal physiologic levels and have been shown to be susceptible to human variant  
374 CJD, sCJD and mouse-adapted 22L scrapie [23, 24]. Tg66 mice do not express any mouse prion  
375 protein.

376 Tg33 mice express mule deer prion protein at 1-2x physiologic levels and their  
377 construction has been described previously [25]. Tg33 mice also do not express any mouse prion  
378 protein but are highly susceptible to CWD-prions [23, 25].

379 Tga20 mice [26] were originally obtained from the European Mouse Mutant Archive and  
380 have been partially backcrossed in-house to a C57BL/10 background. Tga20 homozygous mice  
381 over-express mouse prion protein by 5-10-fold and were used for the 22L scrapie experiments as  
382 they are highly susceptible to mouse-adapted prion agents.

383 Tg7 mice overexpress hamster PrPC (5-fold compared to Syrian hamster) in the absence  
384 of mouse PrPC and their construction has been described previously [27, 28]. Tg7 mice are

385 highly susceptible to infection with the hamster 263K prion agent and develop clinical prion  
386 disease within 50 days following intracranial (ic) inoculation of high titer 263K [29].

387 **Decontamination and bioassay of prion-infected brain homogenates using either eLpH or**  
388 **Wex-cide 128**

389 Ten percent (w/v) brain homogenates (BH) were made from 263K scrapie-infected  
390 hamsters, 22L scrapie-infected C57BL/10 mice, a pool of CWD-infected white-tailed deer  
391 (WTD-1) [23], or sCJD-infected tg66 mouse brains using a mini-bead beater and 1.0 mm glass  
392 beads (Biospec products). Following homogenization, tissues were aliquoted and frozen for  
393 future use. For the decontamination studies, we used preparations of 2% eLpH (vol/vol), 4%  
394 Wex-cide 128 (vol/vol) or 40% Wex-cide 128 (vol/vol). Compared to 2% eLpH, we used 4%  
395 Wex-cide 128 to achieve approximately the same level of BP in each product (Table 1). For the  
396 decontamination, brain homogenates were thawed, vortexed and then 10 µl of each 10% brain  
397 homogenate was mixed with 90 µl of each phenolic disinfectant or saline. Total treatment time  
398 was 30 minutes, with two brief vortexes performed at 10 and 20 minutes. The resulting brain  
399 homogenate concentration during this decontamination was 1% ( $10^{-2}$  dilution). Following the  
400 disinfectant treatments, the brain homogenates were further diluted in serial 10-fold increments  
401 into PBS for inoculation into mice. Due to the acute toxicity of residual Wex-cide 128 in the  
402 40% concentration group, we could not test the  $10^{-3}$  brain homogenate solution. Each dilution  
403 was inoculated intracerebrally into groups of 4-8 susceptible recipient mice. The dilutions tested  
404 for each prion strain and recipient mouse combination can be found in tables 2-7. For the 263K  
405 experiments, tg7 mice were inoculated, 22L prions were inoculated into tga20 mice, CWD was  
406 inoculated into tg33 mice and sCJD was inoculated into tg66 mice. For the inoculation, mice

407 were anesthetized with isoflurane and inoculated in the left-brain hemisphere with 30  $\mu$ l of  
408 disinfectant-treated or saline-treated brain homogenate dilutions.

409

#### 410 **Decontamination and bioassay of 263K or sCJD coated steel wires**

411 Sterile stainless steel suture wires (Havel, size 000), cut into 3–4 mm lengths, were  
412 immersed in either 263K or sCJD 10% brain homogenates for one hour with gentle agitation.  
413 Following immersion, the prion infected brain homogenates were removed using a pipette and  
414 the wires were washed briefly in an excess of sterile water. The water was drawn off and the  
415 wires were allowed to air dry in a sterile petri dish. To decontaminate the wires, wires were  
416 submerged in disinfectants (4% Wex-cide 128 or 2% eLpH) for either 2 or 30 minutes. Saline  
417 was used as a mock disinfectant. To create standard curves for the levels of prion infectivity able  
418 to bind to the steel wires, wires were exposed to ten-fold dilutions of 263K brain homogenate  
419 ( $10^{-1}$ – $10^{-7}$ ) or sCJD brain homogenate ( $10^{-1}$ – $10^{-5}$ ). Wires for each experimental group were put  
420 into 3–8 recipient mice as shown in tables 3 & 7. 263K treated wires were implanted into tg7  
421 mice while sCJD treated wires were implanted into tg66 mice. Wire implantation and pain  
422 management was performed as previously described [11].

423

#### 424 **Clinical observations**

425 All experimental mice were observed once daily by animal care staff and 3-5 times per  
426 week by prion investigators for assessment of overall health and observation for neurologic signs  
427 consistent with prion infection. Mice were euthanized when they developed clinical signs  
428 consistent with prion infection or unrelated conditions necessitating a humane endpoint (e.g.  
429 cancer, dermatitis, respiratory difficulty, chronic ocular lesions). The experiments were ended at

430 ~300 days post-inoculation (dpi) for tg7 mice and tga20 mice and ~650 dpi for tg33 and tg66  
431 mice. At these extended incubation periods it becomes very unlikely to see many additional  
432 mice succumb to prion infection within the described models.

433

#### 434 **Confirmation of prion infection**

435 In the mouse bioassays, experimental mice that were part of untreated or saline control  
436 groups that showed clear signs of clinical prion disease at the expected incubation times, were  
437 recorded as prion positive and brains from only a subset of these mice were collected. Brains  
438 from nearly all mice that were part of the disinfected groups, or brains from mice in the control  
439 groups at dilutions near the endpoint of a titration were screened for evidence of prion disease to  
440 confirm infection status (Supplementary Table 1). Screened mice that showed clinical signs of  
441 prion disease and had evidence of prion infection were scored as positive in the tables 2-7.  
442 Different screening methods were used for the four different mouse models (below paragraphs).  
443 Mice that did not have clinical signs consistent with end-stage prion disease but did have  
444 evidence for prion disease based on a prion screening test were not included as positive mice in  
445 the bioassay tables. This subclinical situation was very rare, and only occurred with three  
446 individual mice that were part of shelf-life experiments (Supplementary Table 1).

447 Brains from tg7 and tga20 mice were screened by immunoblot for the presence of  
448 protease resistant PrP<sup>Sc</sup> using anti-PrP antibody D13 as previously described [30, 31]. Briefly,  
449 brain homogenates were digested with 50  mL proteinase K in weak detergents for 45-60  
450 minutes. Digested samples were run on Novex Wedgewell 12% Tris-Glycine (Invitrogen) gels

451 and the probed with D13 at a 1:50 dilution, followed by anti-human secondary antibody at  
452 1:10,000 then developed with ECL.

453 Tg33 mouse brains were screened by RT-QuIC assay (methods below) for the presence  
454 of prion seeding activity. Most tg66 mouse brains were screened for neuropathology (H&E  
455 sections) and IHC demonstration of prion deposition consistent with prion disease using anti-  
456 prion antibody 3F4 as described [32]. A small subset of tg66 mice that did not have formalin  
457 fixed tissue available were screened by RT-QuIC assay (methods below) for prion seeding  
458 activity rather than neuropathology.

459

#### 460 **Calculation of prion infectivity titers**

461 Infectivity titers were calculated for each experimental group using the Spearman-Kärber  
462 formula [33]. In experiments where no mice succumbed to prion disease at the most concentrated  
463 dilution tested, we assumed a worst-case scenario and estimated that 100% of mice would have  
464 developed disease when inoculated with a 10-fold more concentrated dose. Using this estimated  
465 data allowed the formula to be used in situations where no data was obtained above the limit of  
466 detection. In the tables, calculations resulting from data using an estimated outcome are shown  
467 with a  $\leq$  sign. Prion infectivity titers for the brain homogenate experiments are reported as the  
468  $\log_{10}LD_{50}$  per gram of brain tissue. Titters for the wire experiments performed in tg7 and tg66  
469 mice are reported as  $\log_{10}LD_{50}$  per wire.

470

#### 471 **RT-QuIC assay**



472 RT-QuIC reactions were performed on tg33 and tg66 brains to confirm prion infection  
473 status. The RT-QuIC reaction was performed as previously described [12] using recombinant  
474 hamster 90-231 (Ha rPrP) (accession no. KO2234) as the substrate and a running temperature of  
475 50 degrees Celsius.

476 The plate reader gain was consistent for each run, as were the concentrations of thioflavin  
477 T and SDS in each reaction. The maximum fluorescence readout on our plate reader is 260,000  
478 units. For all runs, the gain was set at 1600. Four replicate wells from the same positive control  
479 mouse brain homogenate were run on each plate. In addition, 4-12 negative control wells were  
480 run at a  $10^{-3}$  brain homogenate dilution on each plate. Individual wells were considered positive  
481 if they reached a fluorescence level greater than 10% of the average fluorescent values measured  
482 for the positive control wells prior to the 30-hour time point. Compared to baseline negative  
483 control wells, an increase in fluorescence from baseline to reach levels equivalent to the 10%  
484 value of positive control samples was typically 20-40 standard deviations above baseline  
485 fluorescence levels. Individual mice were scored positive if  $\geq 50\%$  of the assay wells were  
486 positive.

487

#### 488 **Declarations**

#### 489 **Competing interests**

490 The authors declare that they have no competing interests. Prior to commencing the study, the  
491 authors had discussions regarding formulation chemistry with Mr. Nick Hidell of Quip  
492 Laboratories. Quip Laboratories is the exclusive distributor of the Wex-Cide 128 disinfectant for  
493 life sciences.

494 **Author's contributions and consent for publication**

495 CB performed investigation and formal analysis, BG performed investigation and formal  
496 analysis, AH provided resources, TT performed investigation, BT helped conceptualized the  
497 study, SP helped conceptualize the study and formal analysis, BC helped conceptualize the study  
498 and provided funding acquisition, BR conceptualized the study, provided supervision, performed  
499 investigation and formal analysis, and prepared the original draft. All authors reviewed and  
500 edited the manuscript.

501

502 **Ethics approval**

503 All experimental mice were housed at the Rocky Mountain Laboratory (RML) in an AAALAC-  
504 accredited facility in compliance with guidelines provided by the Guide for the Care and Use of  
505 Laboratory Animals (Institute for Laboratory Animal Research Council). Experimentation and  
506 housing followed RML Animal Care and Use Committee approved protocol #2021-003-E.

507 **Funding**

508 This research was supported by the Intramural Research Program of the NIH, National  
509 Institute of Allergy and Infectious Diseases.

510

511 **Availability of data and materials**

512 The dataset supporting the conclusions of this article are included within the article and  
513 the tables. Raw immunoblot, RT-QuIC and IHC data are available upon requests. Mouse brain

514 tissue homogenates derived from this study are also available from the corresponding author on  
515 request.

516

## 517 **Acknowledgements**

518           We thank Katie Williams and James Striebel for critical review of the manuscript; Robert  
519 Rohwer and Richard Rubenstein for the tg66 transgenic mice and Jeffrey Severson for many  
520 years of animal husbandry. We thank Nick Hidell of Quip Laboratories for invaluable  
521 knowledge and expertise regarding Wex-cide 128 formulation chemistries.

522

523

## 524 Bibliography

- 525 1. Prusiner SB. Prions. *Proc Natl Acad Sci U S A*. 1998;95(23):13363-83. doi:  
526 10.1073/pnas.95.23.13363. PubMed PMID: 9811807; PubMed Central PMCID: PMCPMC33918.
- 527 2. Ernst DR, Race RE. Comparative analysis of scrapie agent inactivation methods. *J Virol Methods*.  
528 1993;41(2):193-201. doi: 10.1016/0166-0934(93)90126-c. PubMed PMID: 8496294.
- 529 3. Taylor DM. Inactivation of transmissible degenerative encephalopathy agents: A review. *Vet J*.  
530 2000;159(1):10-7. Epub 2000/01/21. doi: 10.1053/tvj.1999.0406. PubMed PMID: 10640408.
- 531 4. Race RE, Raymond GJ. Inactivation of transmissible spongiform encephalopathy (prion) agents  
532 by environ LpH. *J Virol*. 2004;78(4):2164-5. doi: 10.1128/jvi.78.4.2164-2165.2004. PubMed PMID:  
533 14747583; PubMed Central PMCID: PMCPMC369477.
- 534 5. Giles K, Glidden DV, Beckwith R, Seoanes R, Peretz D, DeArmond SJ, et al. Resistance of bovine  
535 spongiform encephalopathy (BSE) prions to inactivation. *PLoS Pathog*. 2008;4(11):e1000206. Epub  
536 2008/11/15. doi: 10.1371/journal.ppat.1000206. PubMed PMID: 19008948; PubMed Central PMCID:  
537 PMCPMC2576443.
- 538 6. Bian J, Kang HE, Telling GC. Quinacrine promotes replication and conformational mutation of  
539 chronic wasting disease prions. *Proc Natl Acad Sci U S A*. 2014;111(16):6028-33. Epub 2014/04/09. doi:  
540 10.1073/pnas.1322377111. PubMed PMID: 24711410; PubMed Central PMCID: PMCPMC4000840.
- 541 7. Cronier S, Beringue V, Bellon A, Peyrin JM, Laude H. Prion strain- and species-dependent effects  
542 of antiprion molecules in primary neuronal cultures. *J Virol*. 2007;81(24):13794-800. Epub 2007/10/05.  
543 doi: 10.1128/JVI.01502-07. PubMed PMID: 17913812; PubMed Central PMCID: PMCPMC2168876.
- 544 8. Peretz D, Supattapone S, Giles K, Vergara J, Freyman Y, Lessard P, et al. Inactivation of prions by  
545 acidic sodium dodecyl sulfate. *J Virol*. 2006;80(1):322-31. Epub 2005/12/15. doi: 10.1128/JVI.80.1.322-  
546 331.2006. PubMed PMID: 16352557; PubMed Central PMCID: PMCPMC1317507.
- 547 9. Belondrade M, Jas-Duval C, Nicot S, Bruyere-Ostells L, Mayran C, Herzog L, et al. Correlation  
548 between Bioassay and Protein Misfolding Cyclic Amplification for Variant Creutzfeldt-Jakob Disease  
549 Decontamination Studies. *mSphere*. 2020;5(1). Epub 20200129. doi: 10.1128/mSphere.00649-19.  
550 PubMed PMID: 31996421; PubMed Central PMCID: PMCPMC6992370.
- 551 10. Moudjou M, Castille J, Passet B, Herzog L, Reine F, Vilotte JL, et al. Improving the Predictive  
552 Value of Prion Inactivation Validation Methods to Minimize the Risks of Iatrogenic Transmission With  
553 Medical Instruments. *Front Bioeng Biotechnol*. 2020;8:591024. Epub 20201201. doi:  
554 10.3389/fbioe.2020.591024. PubMed PMID: 33335894; PubMed Central PMCID: PMCPMC7736614.
- 555 11. Hughson AG, Race B, Kraus A, Sangare LR, Robins L, Groveman BR, et al. Inactivation of Prions  
556 and Amyloid Seeds with Hypochlorous Acid. *PLoS Pathog*. 2016;12(9):e1005914. Epub 2016/09/30. doi:  
557 10.1371/journal.ppat.1005914. PubMed PMID: 27685252; PubMed Central PMCID: PMCPMC5042475  
558 following competing interests: DT is founder and CEO of BrioTech Inc, which sells BrioHOCITM. A gift  
559 from BrioTech was used to support the work at UW Bothell lead by LR. JFW is Chief Scientific Officer,  
560 corporate executive and shareholder of Briotech Inc.
- 561 12. Williams K, Hughson AG, Chesebro B, Race B. Inactivation of chronic wasting disease prions  
562 using sodium hypochlorite. *PLoS One*. 2019;14(10):e0223659. Epub 20191004. doi:  
563 10.1371/journal.pone.0223659. PubMed PMID: 31584997; PubMed Central PMCID: PMCPMC6777796.
- 564 13. Zobeley E, Flechsig E, Cozzio A, Enari M, Weissmann C. Infectivity of scrapie prions bound to a  
565 stainless steel surface. *Mol Med*. 1999;5(4):240-3. Epub 1999/08/17. PubMed PMID: 10448646; PubMed  
566 Central PMCID: PMCPMC2230327.
- 567 14. Flechsig E, Hegyi I, Enari M, Schwarz P, Collinge J, Weissmann C. Transmission of scrapie by steel-  
568 surface-bound prions. *Mol Med*. 2001;7(10):679-84. Epub 2001/11/20. PubMed PMID: 11713367;  
569 PubMed Central PMCID: PMCPMC1949999.

- 570 15. Jackson GS, McKintosh E, Flechsig E, Prodromidou K, Hirsch P, Linehan J, et al. An enzyme-  
571 detergent method for effective prion decontamination of surgical steel. *J Gen Virol.* 2005;86(Pt 3):869-  
572 78. Epub 2005/02/22. doi: 10.1099/vir.0.80484-0. PubMed PMID: 15722550.
- 573 16. Fichet G, Comoy E, Duval C, Antloga K, Dehen C, Charbonnier A, et al. Novel methods for  
574 disinfection of prion-contaminated medical devices. *Lancet.* 2004;364(9433):521-6. Epub 2004/08/11.  
575 doi: 10.1016/S0140-6736(04)16810-4. PubMed PMID: 15302195.
- 576 17. Mori T, Atarashi R, Furukawa K, Takatsuki H, Satoh K, Sano K, et al. A direct assessment of  
577 human prion adhered to steel wire using real-time quaking-induced conversion. *Sci Rep.* 2016;6:24993.  
578 Epub 20160426. doi: 10.1038/srep24993. PubMed PMID: 27112110; PubMed Central PMCID:  
579 PMC4845018.
- 580 18. La Mendola D, Rizzarelli E. Evolutionary implications of metal binding features in different  
581 species' prion protein: an inorganic point of view. *Biomolecules.* 2014;4(2):546-65. Epub 20140523. doi:  
582 10.3390/biom4020546. PubMed PMID: 24970230; PubMed Central PMCID: PMC4101497.
- 583 19. Belondrade M, Nicot S, Beringue V, Coste J, Lehmann S, Bougard D. Rapid and Highly Sensitive  
584 Detection of Variant Creutzfeldt-Jakob Disease Abnormal Prion Protein on Steel Surfaces by Protein  
585 Misfolding Cyclic Amplification: Application to Prion Decontamination Studies. *PLoS One.*  
586 2016;11(1):e0146833. Epub 20160122. doi: 10.1371/journal.pone.0146833. PubMed PMID: 26800081;  
587 PubMed Central PMCID: PMC4723062.
- 588 20. Brown P, Gibbs CJ, Jr., Amyx HL, Kingsbury DT, Rohwer RG, Sulima MP, et al. Chemical  
589 disinfection of Creutzfeldt-Jakob disease virus. *N Engl J Med.* 1982;306(21):1279-82. Epub 1982/05/27.  
590 doi: 10.1056/NEJM198205273062107. PubMed PMID: 7040968.
- 591 21. Brown P, Rohwer RG, Gajdusek DC. Newer data on the inactivation of scrapie virus or  
592 Creutzfeldt-Jakob disease virus in brain tissue. *J Infect Dis.* 1986;153(6):1145-8. Epub 1986/06/01. doi:  
593 10.1093/infdis/153.6.1145. PubMed PMID: 3084671.
- 594 22. Walker AS, Inderlied CB, Kingsbury DT. Conditions for the chemical and physical inactivation of  
595 the K. Fu. strain of the agent of Creutzfeldt-Jakob disease. *Am J Public Health.* 1983;73(6):661-5. Epub  
596 1983/06/01. doi: 10.2105/ajph.73.6.661. PubMed PMID: 6342430; PubMed Central PMCID:  
597 PMC1650862.
- 598 23. Race B, Meade-White KD, Miller MW, Barbian KD, Rubenstein R, LaFauci G, et al. Susceptibilities  
599 of nonhuman primates to chronic wasting disease. *Emerg Infect Dis.* 2009;15(9):1366-76. Epub  
600 2009/10/01. doi: 10.3201/eid1509.090253. PubMed PMID: 19788803; PubMed Central PMCID:  
601 PMC2819871.
- 602 24. Race B, Phillips K, Meade-White K, Striebel J, Chesebro B. Increased infectivity of anchorless  
603 mouse scrapie prions in transgenic mice overexpressing human prion protein. *J Virol.* 2015;89(11):6022-  
604 32. Epub 2015/03/27. doi: 10.1128/JVI.00362-15. PubMed PMID: 25810548; PubMed Central PMCID:  
605 PMC4442444.
- 606 25. Meade-White K, Race B, Trifilo M, Bossers A, Favara C, Lacasse R, et al. Resistance to chronic  
607 wasting disease in transgenic mice expressing a naturally occurring allelic variant of deer prion protein. *J*  
608 *Virol.* 2007;81(9):4533-9. Epub 2007/02/23. doi: 10.1128/JVI.02762-06. PubMed PMID: 17314157;  
609 PubMed Central PMCID: PMC1900179.
- 610 26. Brandner S, Isenmann S, Raeber A, Fischer M, Sailer A, Kobayashi Y, et al. Normal host prion  
611 protein necessary for scrapie-induced neurotoxicity. *Nature.* 1996;379(6563):339-43. doi:  
612 10.1038/379339a0. PubMed PMID: 8552188.
- 613 27. Scott M, Foster D, Mirenda C, Serban D, Coufal F, Walchli M, et al. Transgenic mice expressing  
614 hamster prion protein produce species-specific scrapie infectivity and amyloid plaques. *Cell.*  
615 1989;59(5):847-57. Epub 1989/12/01. PubMed PMID: 2574076.
- 616 28. Race RE, Priola SA, Bessen RA, Ernst D, Dockter J, Rall GF, et al. Neuron-specific expression of a  
617 hamster prion protein minigene in transgenic mice induces susceptibility to hamster scrapie agent.

618 Neuron. 1995;15(5):1183-91. doi: 10.1016/0896-6273(95)90105-1. PubMed PMID: 7576660; PubMed  
619 Central PMCID: PMCPMC7135899.

620 29. Kercher L, Favara C, Chan CC, Race R, Chesebro B. Differences in scrapie-induced pathology of  
621 the retina and brain in transgenic mice that express hamster prion protein in neurons, astrocytes, or  
622 multiple cell types. *Am J Pathol.* 2004;165(6):2055-67. doi: 10.1016/S0002-9440(10)63256-7. PubMed  
623 PMID: 15579448; PubMed Central PMCID: PMCPMC1618708.

624 30. Matsunaga Y, Peretz D, Williamson A, Burton D, Mehlhorn I, Groth D, et al. Cryptic epitopes in N-  
625 terminally truncated prion protein are exposed in the full-length molecule: dependence of conformation  
626 on pH. *Proteins.* 2001;44(2):110-8. doi: 10.1002/prot.1077. PubMed PMID: 11391773.

627 31. Race B, Williams K, Baune C, Striebel JF, Long D, Thomas T, et al. Microglia have limited influence  
628 on early prion pathogenesis, clearance, or replication. *PLoS One.* 2022;17(10):e0276850. Epub  
629 20221027. doi: 10.1371/journal.pone.0276850. PubMed PMID: 36301895; PubMed Central PMCID:  
630 PMCPMC9612458.

631 32. Groveman BR, Race B, Foliaki ST, Williams K, Hughson AG, Baune C, et al. Sporadic Creutzfeldt-  
632 Jakob disease infected human cerebral organoids retain the original human brain subtype features  
633 following transmission to humanized transgenic mice. *Acta Neuropathol Commun.* 2023;11(1):28. Epub  
634 20230214. doi: 10.1186/s40478-023-01512-1. PubMed PMID: 36788566; PubMed Central PMCID:  
635 PMCPMC9930245.

636 33. Wilham JM, Orru CD, Bessen RA, Atarashi R, Sano K, Race B, et al. Rapid end-point quantitation  
637 of prion seeding activity with sensitivity comparable to bioassays. *PLoS Pathog.* 2010;6(12):e1001217.  
638 Epub 2010/12/15. doi: 10.1371/journal.ppat.1001217. PubMed PMID: 21152012; PubMed Central  
639 PMCID: PMCPMC2996325.

640

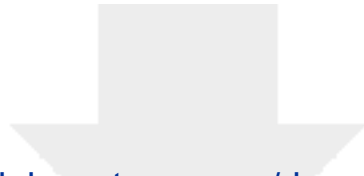

Click here to access/download  
**Supporting Information**  
Supplementary Table 1.docx

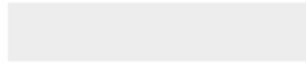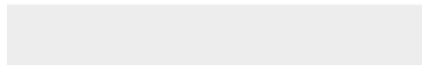



[Click here to access/download](#)

**Supporting Information**

NIH Cover Sheet-Peer Rev-Sonja Best.pdf

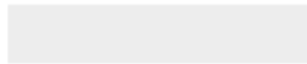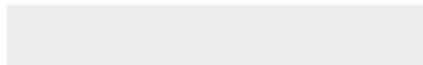

Supplement: pone.0290325.s002.pdf [file pone.0290325.s002.pdf]
